# Supplementary material for: eIF3 engages with 3’-UTR termini of highly translated mRNAs
Source: eLife journal article supplement (doi:10.7554/elife.102977), 2024-11-07
Supplement: fig1-figsupp1-data2 [file Fig1Supp1B_puromycin_totalproteinstain_labeled.pdf › Figure1-figure supplement 1-source data 2/Fig1Supp1B_puromycin_totalproteinstain_labeled.pdf]

|                            | NPCs |    | Forebrain NPCs |    | NPCs |    | Forebrain NPCs |    |
|----------------------------|------|----|----------------|----|------|----|----------------|----|
| Differentiation time (hrs) | 2    | 2  | 2              | 2  | 2    | 2  | 2              | 2  |
| Cell seeding time (hrs)    | 24   | 24 | 48             | 48 | 24   | 24 | 48             | 48 |

Total Protein Stain

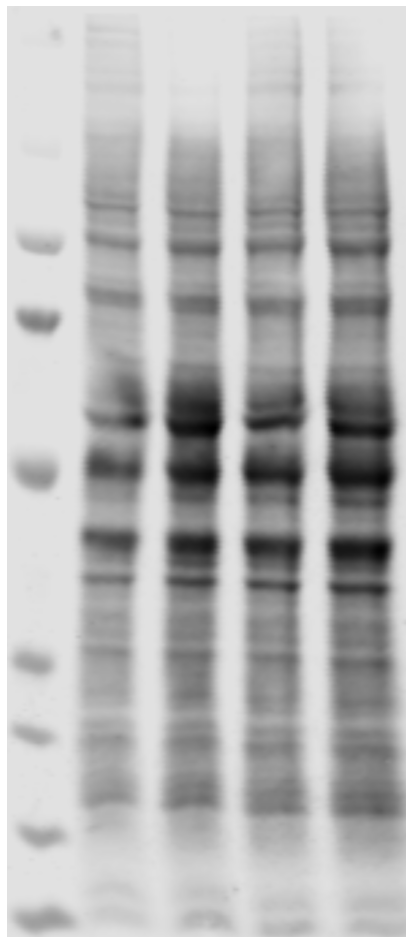

06212021

Puromycin

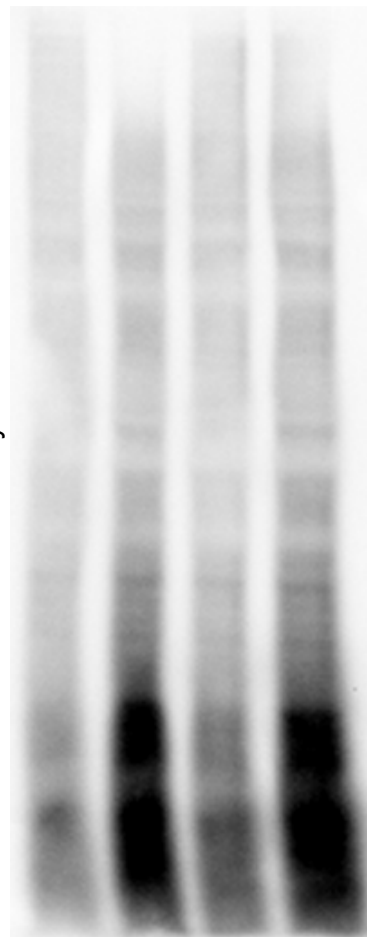

06222021
