# Supplementary material for: eIF3 engages with 3’-UTR termini of highly translated mRNAs
Source: eLife journal article supplement (doi:10.7554/elife.102977), 2024-11-07
Supplement: fig1-figsupp5-data2 [file Fig1Supp5_IR-RNAs_RPS19_labeled.pdf › Figure1-figure supplement 5-source data 2/Fig1Supp5_IR-RNAs_RPS19_labeled.pdf]

Yeon Lee's IR Adaptor

Santi's IR Adaptor

RNase I Dil'n 1:10

1:500

1:1000

1:2000

1:1000

Input FTH ELU FTH ELU FTH ELU FTH ELU Input FTH ELU

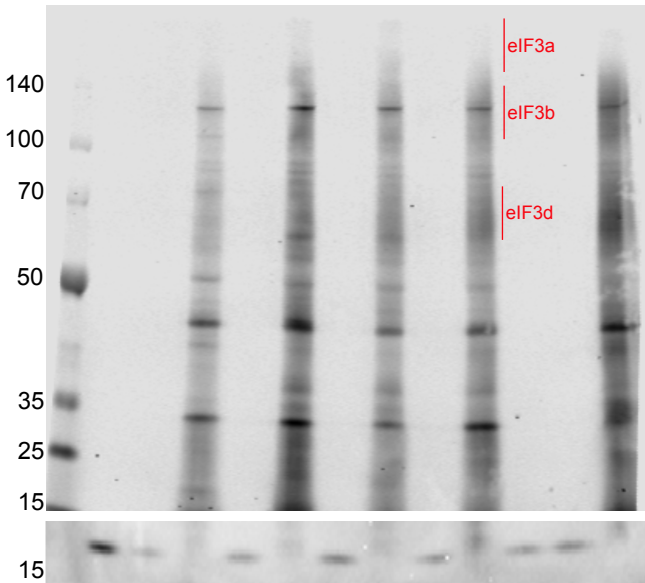

IR  
RNAs

rpS19
