# Supplementary material for: eIF3 engages with 3’-UTR termini of highly translated mRNAs
Source: eLife. 2025 Jan 29;13:RP102977. doi: 10.7554/eLife.102977 (PMC11778930; doi:10.7554/eLife.102977)
Supplement: Supplementary file 7. [file elife-102977-supp7.xlsx]

## Sheet: Sheet1
List of antibodies used in this study
Antibody	Supplier Name	Catalog #
Puromycin	Abcam	ab315887
EIF3A	Bethyl	A302-002A
EIF3B	Bethyl	A301-760A
EIF3C	Bethyl	A300-377A
EIF3D	Bethyl	A301-758A
EIF3E	Bethyl	A302-984A
EIF3F	Bethyl	A303-005A
EIF3H	Bethyl	A301-754A
EIF3I	ThermoFisher Scientific	PA5-56302
EIF3K	Bethyl	A301-763A
EIF3L	Bethyl	A304-753A
EIF3M	Bethyl	A304-761A
RPS19	Abcam	ab181365
EIF4E	Bethyl	A301-153A
HSP90	Cell Signaling Technology	4874S
2025-10-04	Abcam	ab19857
PAX6	Covance	PRB-278P-100
SOX1	Abcam	ab109290
ID2	Abcam	ab53545
SLC38A2	ThermoFisher Scientific	PA5-106786
PABPC1	Abcam	ab312314
PAIP1	Abcam	ab181359
