# Supplementary figures and images for: eIF3 engages with 3’-UTR termini of highly translated mRNAs
Source: eLife journal article supplement (doi:10.7554/elife.102977), 2024-11-07

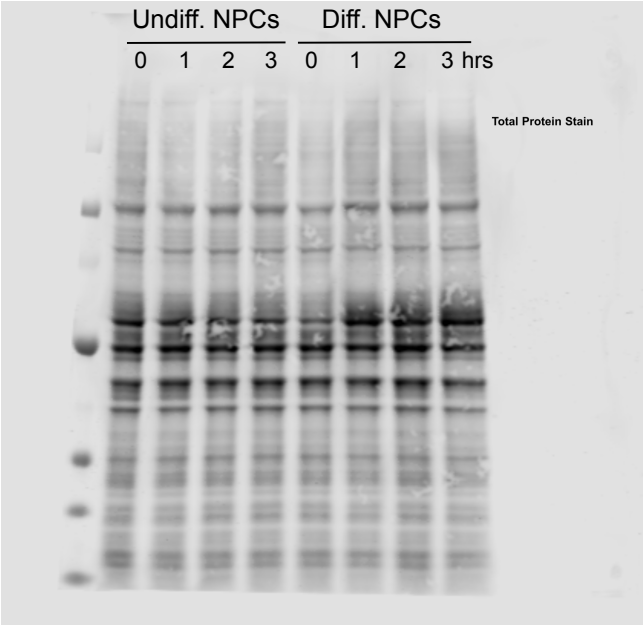

Supplement: fig1-data2 [file elife-102977-fig1-data2-v1.zip]

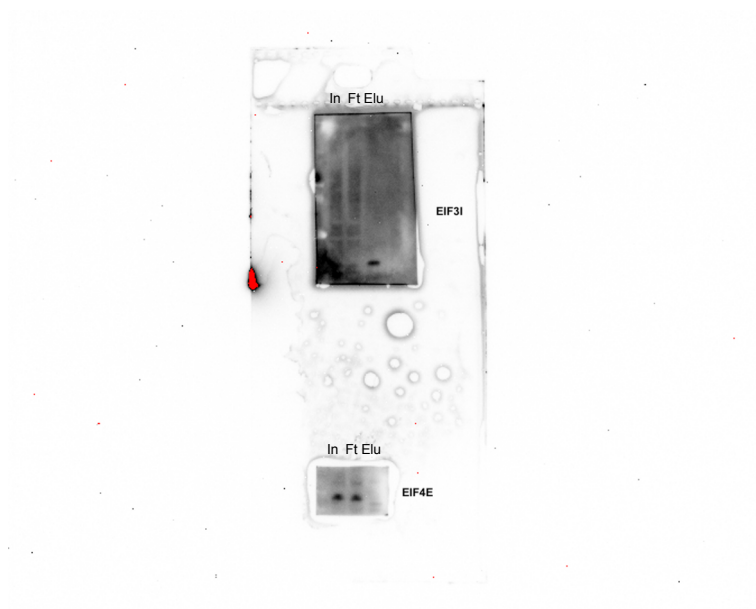

Supplement: fig1-data2 [file elife-102977-fig1-data2-v1.zip]

In FtElu

EIF3I

EIF3J

EIF3G

EIF4E

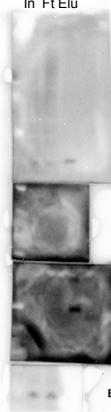

Supplement: fig1-data2 [file elife-102977-fig1-data2-v1.zip]

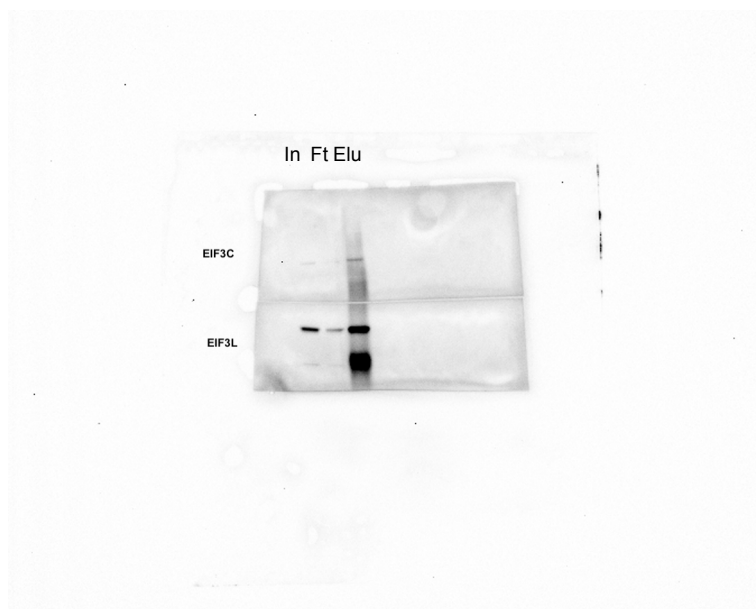

Supplement: fig1-data2 [file elife-102977-fig1-data2-v1.zip]

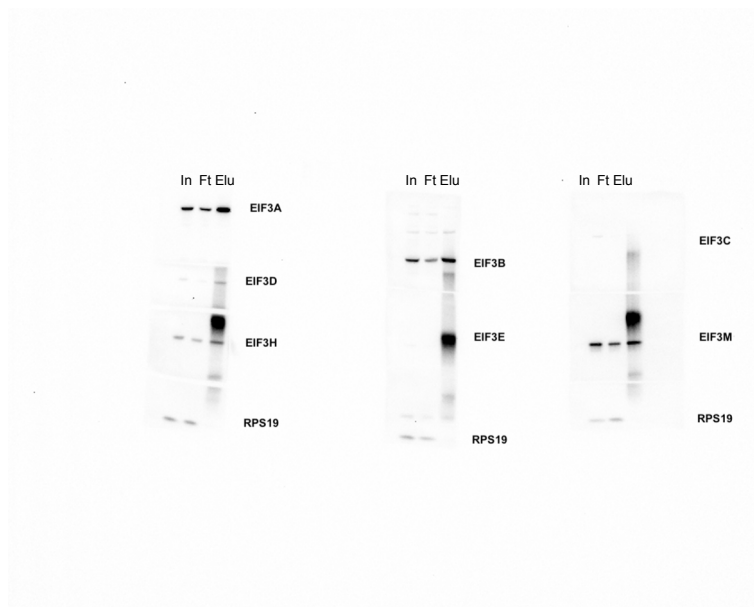

Supplement: fig1-data2 [file elife-102977-fig1-data2-v1.zip]

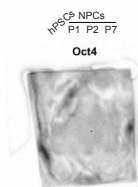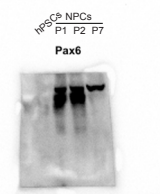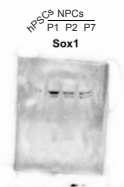

Supplement: fig1-data2 [file elife-102977-fig1-data2-v1.zip]

# NPCs

Diff.

Undiff.

260

140

100

70

50

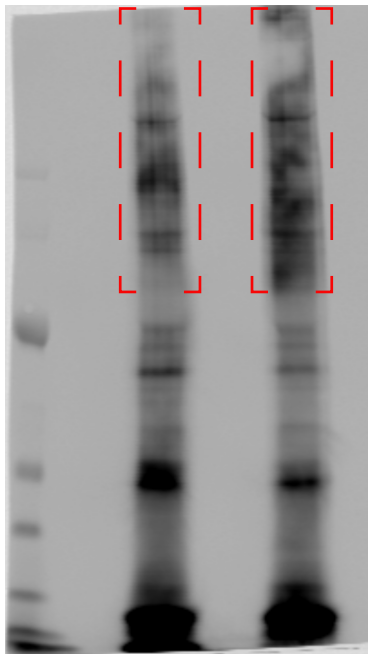

Supplement: fig1-data2 [file elife-102977-fig1-data2-v1.zip]

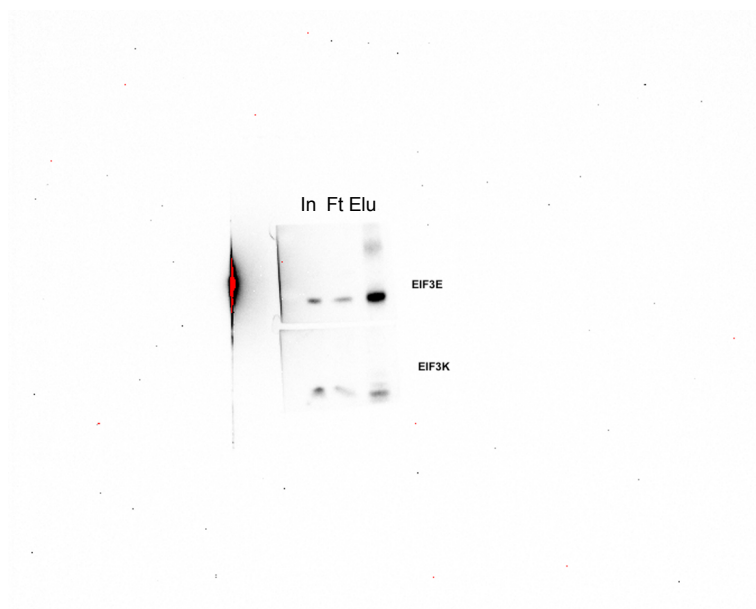

Supplement: fig1-data2 [file elife-102977-fig1-data2-v1.zip]

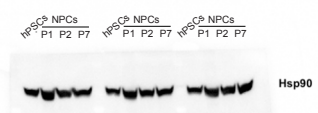

Supplement: fig1-data2 [file elife-102977-fig1-data2-v1.zip]

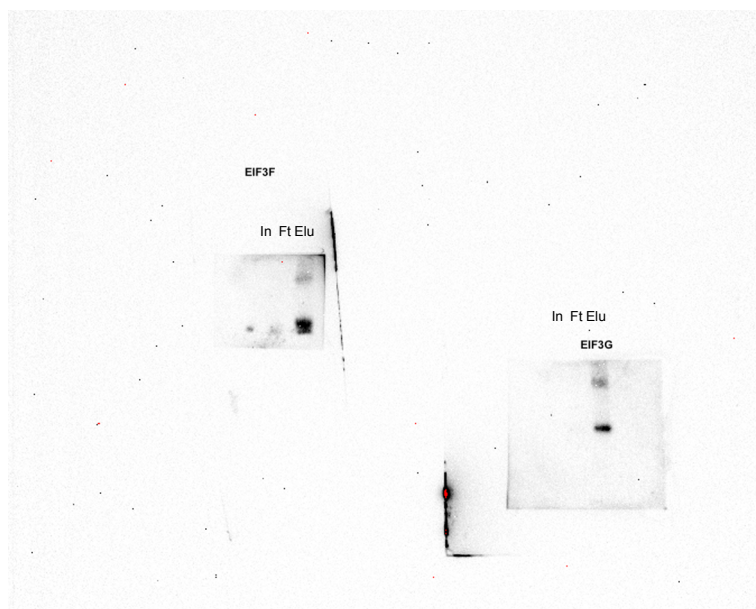

Supplement: fig1-data2 [file elife-102977-fig1-data2-v1.zip]

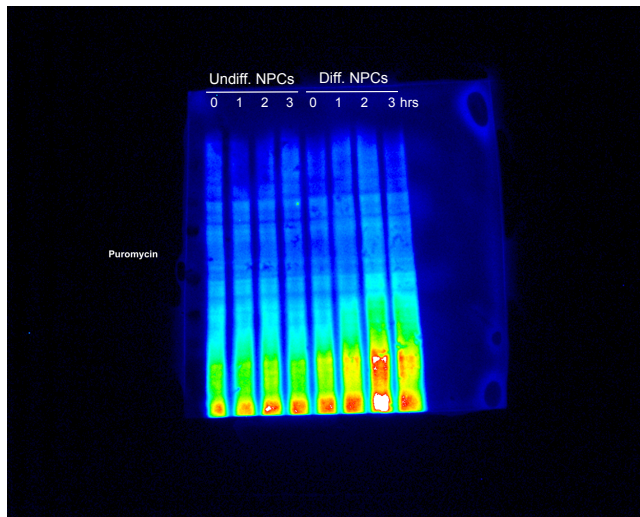

Supplement: fig1-data2 [file elife-102977-fig1-data2-v1.zip]

hPSCs NPCs  
P1 P2 P7

Oct4

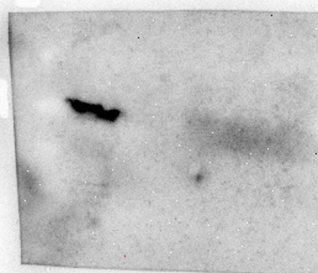

Supplement: fig1-data2 [file elife-102977-fig1-data2-v1.zip]

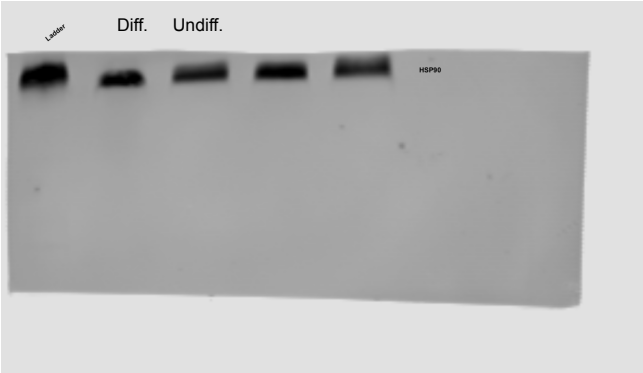

Supplement: fig3-data2 [file elife-102977-fig3-data2-v1.zip]

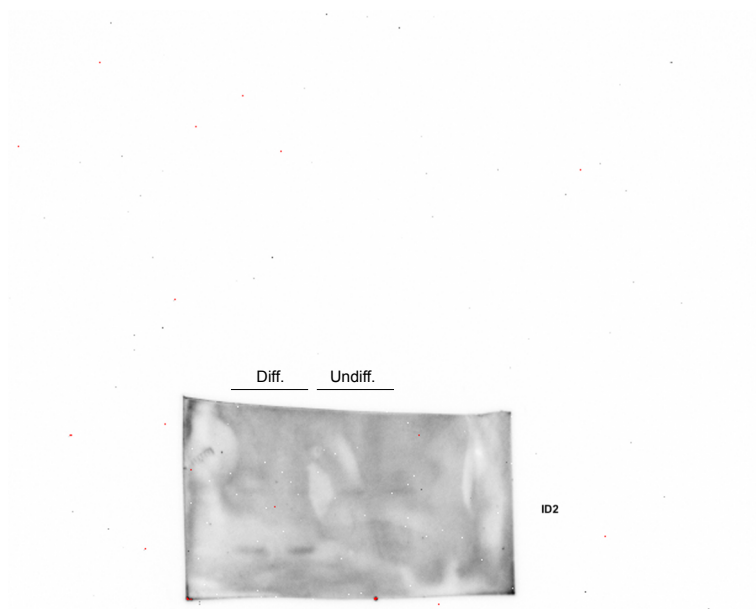

Supplement: fig3-data2 [file elife-102977-fig3-data2-v1.zip]

Diff. Undiff.

SLC38A2

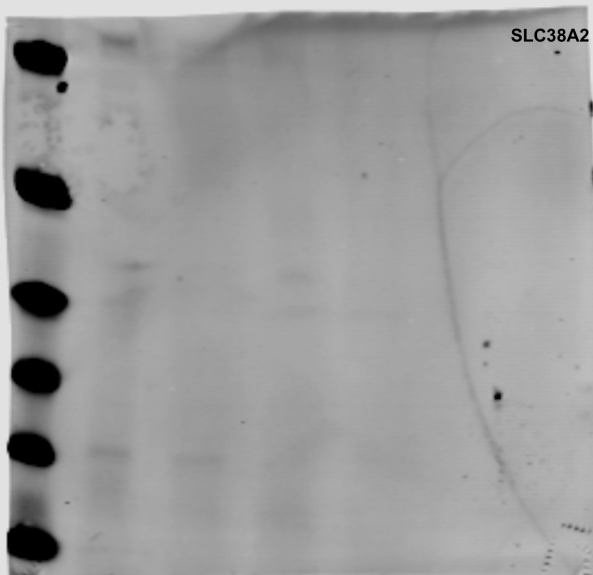

Supplement: fig3-data2 [file elife-102977-fig3-data2-v1.zip]

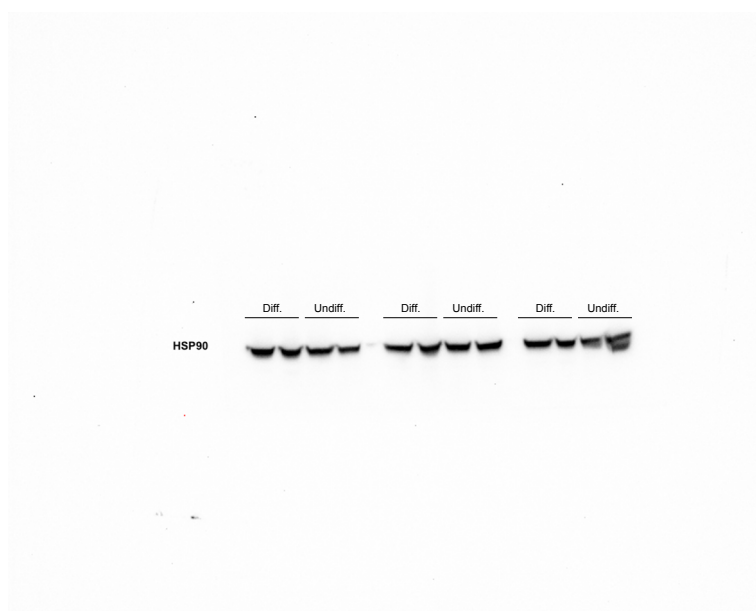

Supplement: fig3-data2 [file elife-102977-fig3-data2-v1.zip]

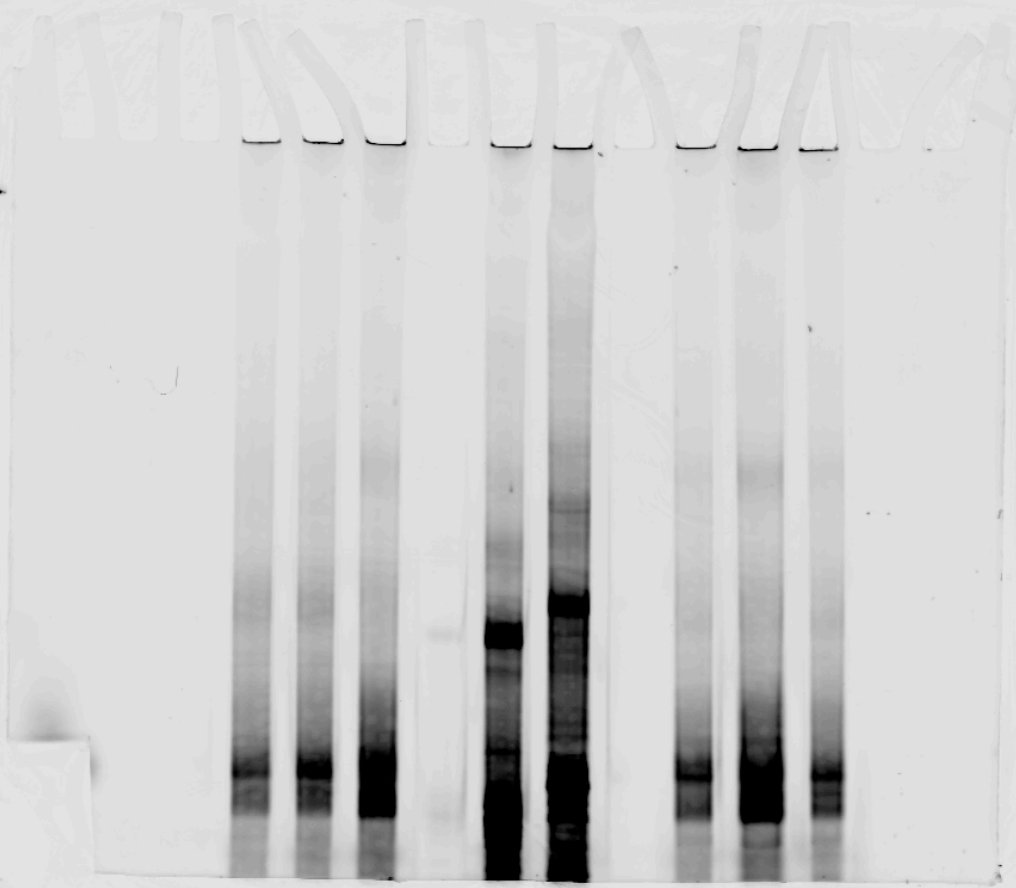

Supplement: fig3-figsupp1-data1 [file Fig3Supp1_NativeGel_RiboSeq_original.pdf › Figure3-figure supplement 1-source data 1/Fig3Supp1_NativeGel_RiboSeq_original.pdf]

Undifferentiated  
NPCs

Ladders

Differentiated  
NPCs

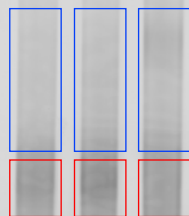

60

30

80

40

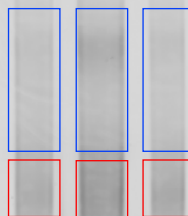

Disome Libraries

Monosome Libraries

Supplement: fig3-figsupp1-data2 [file Fig3Supp1_NativeGel_RiboSeq_labeled.pdf › Figure3-figure supplement 1-source data 2/Fig3Supp1_NativeGel_RiboSeq_labeled.pdf]

SLC38A2

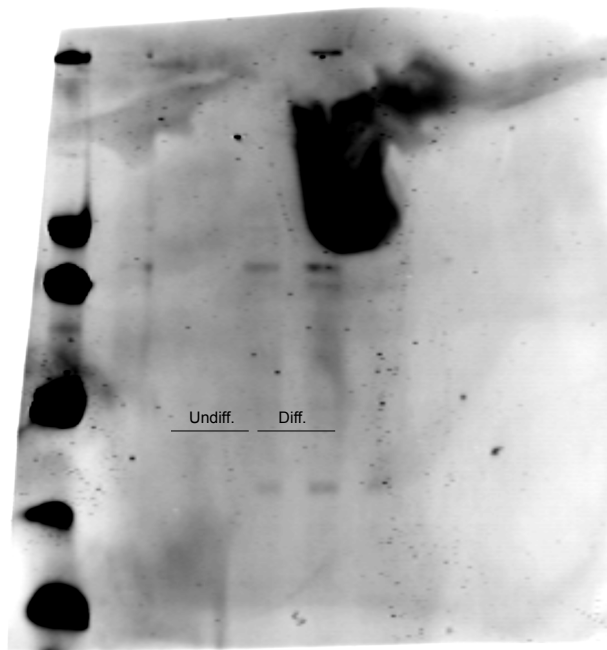

Supplement: fig3-figsupp3-data2 [file Fig3Supp3_SLC38A2_labeled.pdf › Figure3-figure supplement 3-source data 2/Fig3Supp3_SLC38A2_labeled.pdf]

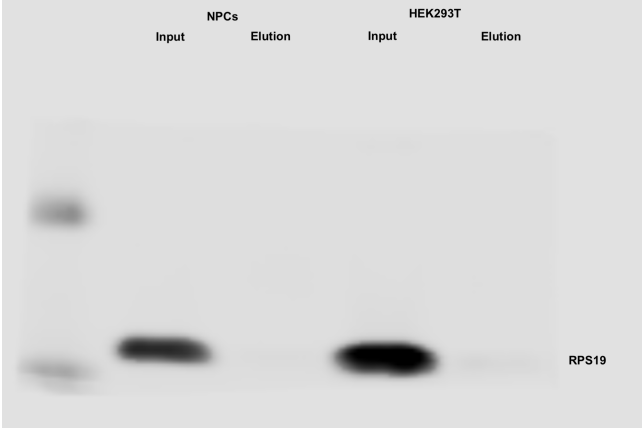

Supplement: fig4-data2 [file elife-102977-fig4-data2-v1.zip]

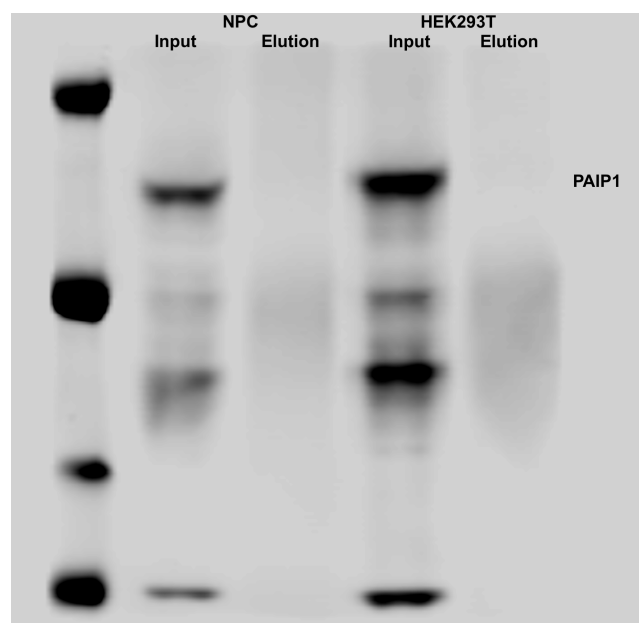

Supplement: fig4-data2 [file elife-102977-fig4-data2-v1.zip]

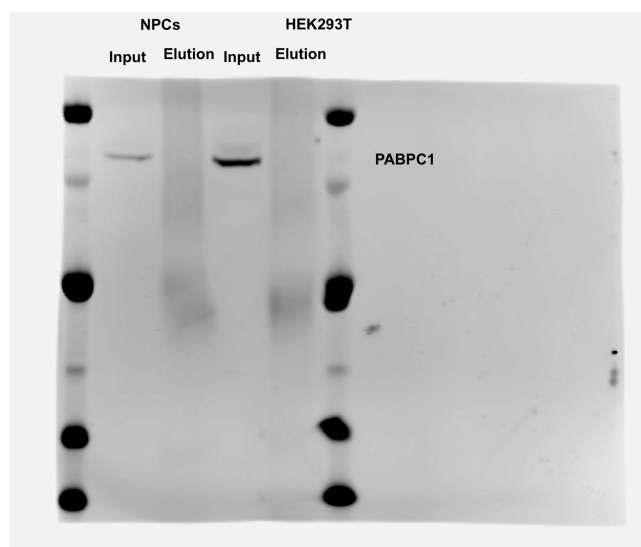

Supplement: fig4-data2 [file elife-102977-fig4-data2-v1.zip]

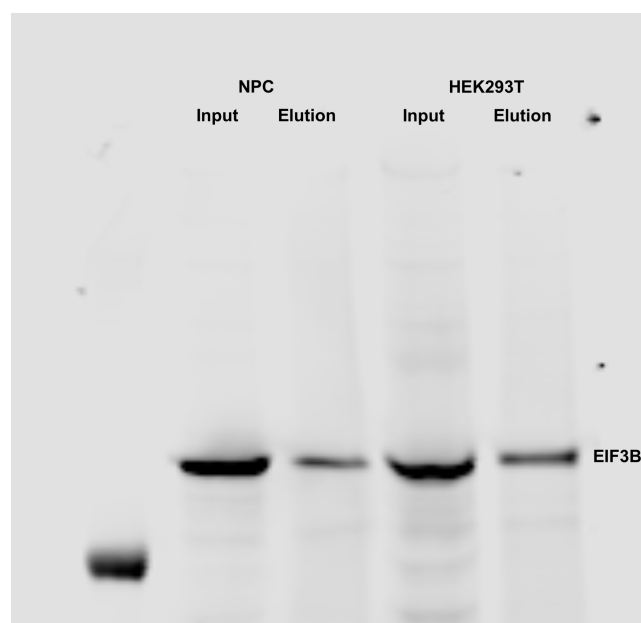

Supplement: fig4-data2 [file elife-102977-fig4-data2-v1.zip]

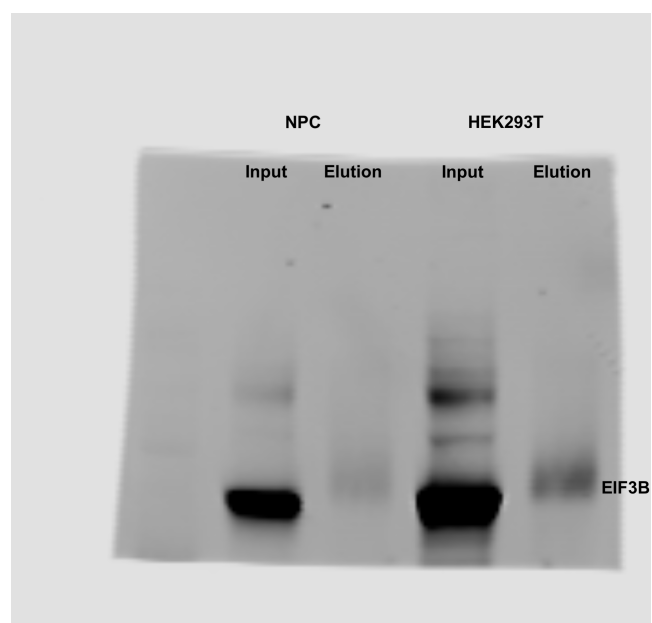

Supplement: fig4-figsupp1-data2 [file Fig4Supp1C_EIF3B_NPC_HEK293T_labeled.pdf › Figure4-figure supplement 1-source data 2/Fig4Supp1C_EIF3B_NPC_HEK293T_labeled.pdf]

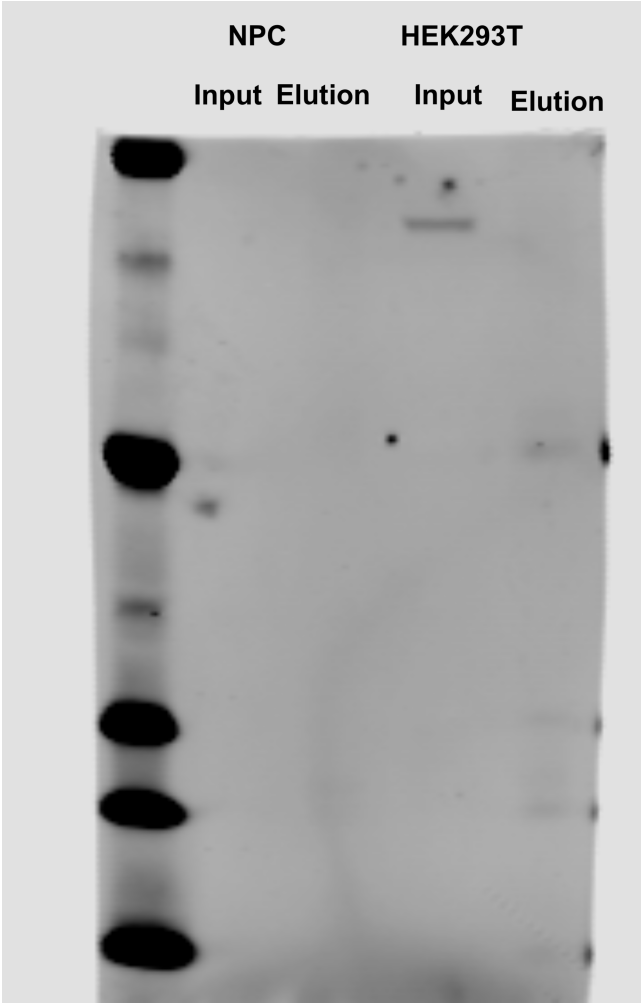

Supplement: fig4-figsupp1-data2 [file Fig4Supp1C_PABPC1_NPC_HEK293T_labeled.pdf › Figure4-figure supplement 1-source data 2/Fig4Supp1C_PABPC1_NPC_HEK293T_labeled.pdf]

NPC

HEK293T

Input Elution Input Elution

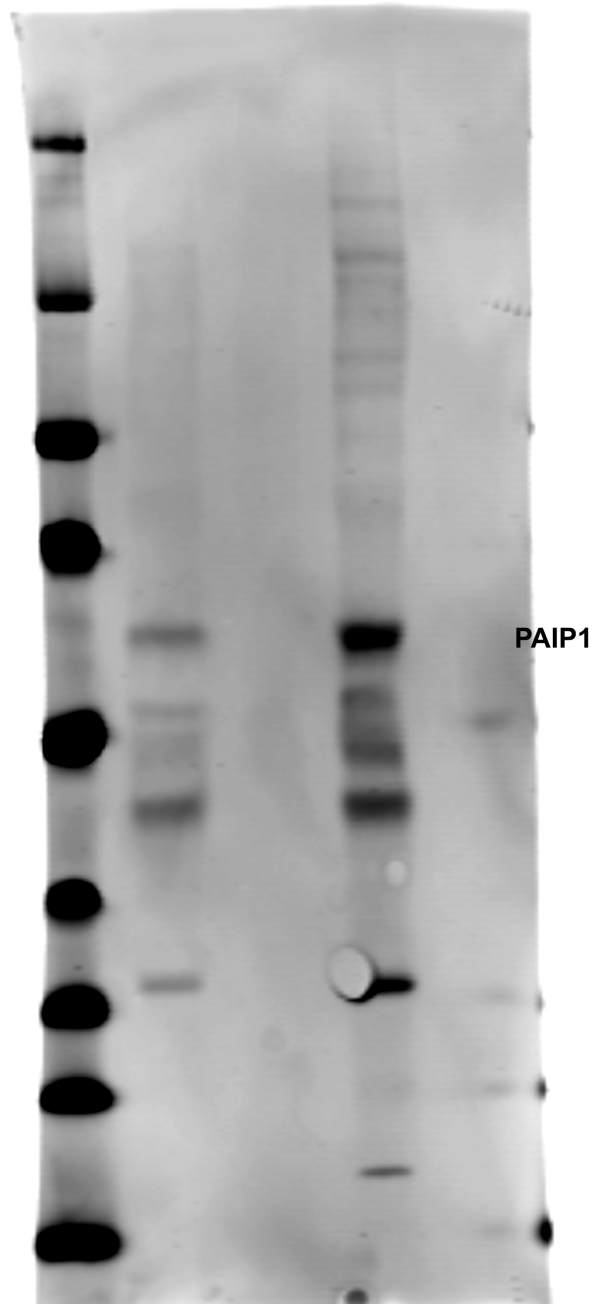

Supplement: fig4-figsupp1-data2 [file Fig4Supp1C_PAIP1_NPC_HEK293T_labeled.pdf › Figure4-figure supplement 1-source data 2/Fig4Supp1C_PAIP1_NPC_HEK293T_labeled.pdf]

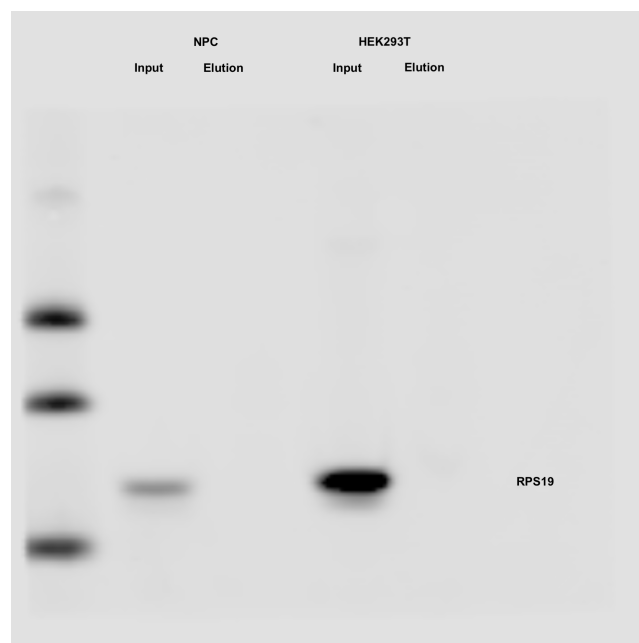

Supplement: fig4-figsupp1-data2 [file Fig4Supp1C_RPS19_NPC_HEK293T_labeled.pdf › Figure4-figure supplement 1-source data 2/Fig4Supp1C_RPS19_NPC_HEK293T_labeled.pdf]
